# Supplementary material for: Three New Phthalide Glycosides from the Rhizomes of Cnidium officinale and Their Recovery Effect on Damaged Otic Hair Cells in Zebrafish
Source: MDPI journal article supplement (doi:10.3390/molecules26227034), 2021-11-21
Supplement: s1 [file s1]

# Three new phthalide glycosides from the rhizomes of *Cnidium officinalis* and their recovery effect on damaged otic hair cells in zebrafish

Hyoung-Geun Kim <sup>1†</sup>, Seon Min Oh <sup>1,2†</sup>, Na Woo Kim <sup>1</sup>, Ji Heon Shim <sup>1</sup>, Youn Hee Nam <sup>1</sup>, Nguyen Trong Nguyen <sup>1</sup>, Min-Ho Lee <sup>3</sup>, Dae Young Lee <sup>2</sup>, Tong Ho Kang <sup>1</sup>, Nam-In Baek <sup>1,\*</sup>

<sup>1</sup> Graduate School of Biotechnology and Department of Oriental Medicinal Biotechnology, Kyung Hee University, Yongin 17104, Korea; zwang05@khu.ac.kr (H.-G.K.); seonmin88@khu.ac.kr (S.M.O.); nawoonifty@khu.ac.kr (N.W.K.); jee1015235@gmail.com (J.H.S.); 01030084217@hanmail.net (Y.H.N.); ntnguyen@khu.ac.kr (N.T.N.); panjae@khu.ac.kr (T.H.K.)

<sup>2</sup> Department of Herbal Crop Research, National Institute of Horticultural and Herbal Science, RDA, Eumseong 27709, Republic of Korea; seonmin88@khu.ac.kr (S.M.O.); dylee0809@gmail.com (D.Y.L.)

<sup>3</sup> Department of Food Technology and Services, Eulji University, Seongnam 13135, Republic of Korea; minho@eulji.ac.kr (M.-H.L.)

\* Correspondence: nibaek@khu.ac.kr; Tel.: +82-31-201-2661

† Co-first author, these authors contributed equally to this work

## Contents:

S1: <sup>13</sup>C and <sup>1</sup>H NMR spectra of ligusticoside C (600 MHz, CD<sub>3</sub>OD).

S2: <sup>13</sup>C and <sup>1</sup>H NMR spectra of ligusticoside D (600 MHz, CD<sub>3</sub>OD).

S3: <sup>13</sup>C and <sup>1</sup>H NMR spectra of ligusticoside E (600 MHz, CD<sub>3</sub>OD).

S4: <sup>1</sup>H-<sup>1</sup>H COSY, HSQC, and HMBC spectra of ligusticoside C (600 MHz, CD<sub>3</sub>OD).

S5: <sup>1</sup>H-<sup>1</sup>H COSY, HSQC, and HMBC spectra of ligusticoside D (600 MHz, CD<sub>3</sub>OD).

S6: <sup>1</sup>H-<sup>1</sup>H COSY, HSQC, and HMBC spectra of ligusticoside E (600 MHz, CD<sub>3</sub>OD).

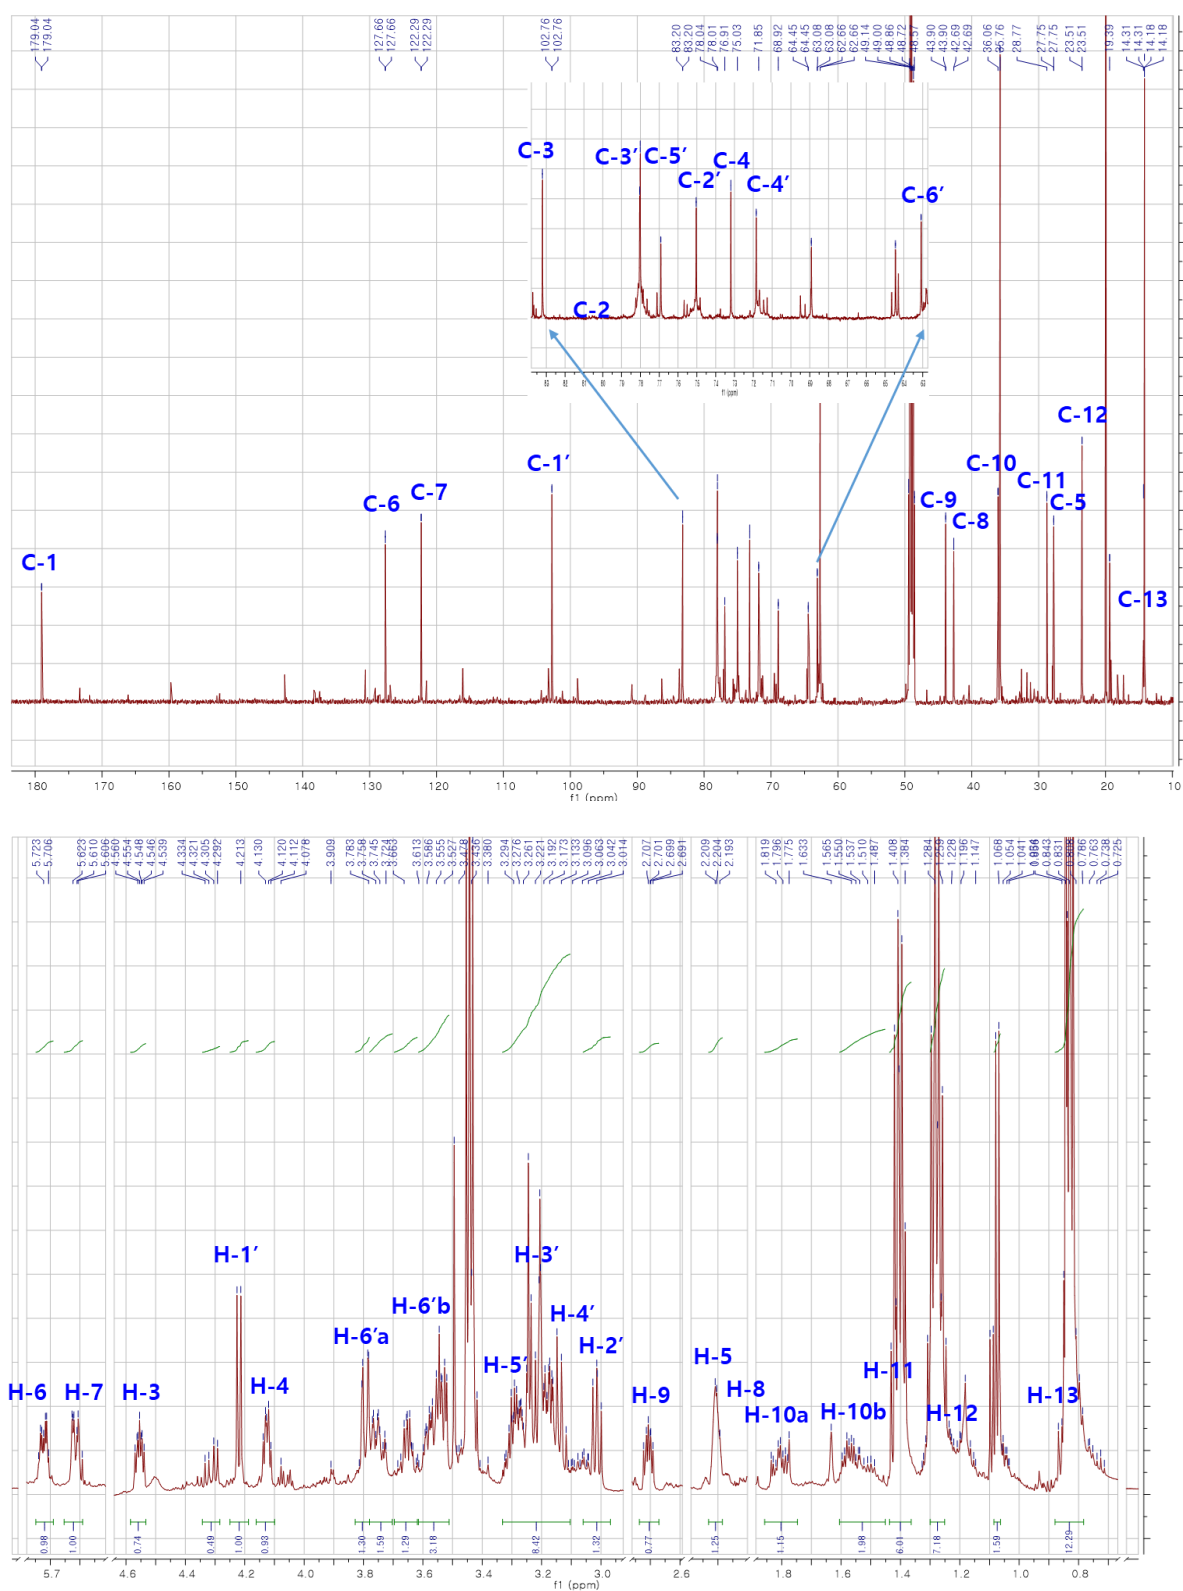

Figure S1. <sup>13</sup>C and <sup>1</sup>H NMR spectra of ligusticoside C (600 MHz, CD<sub>3</sub>OD).

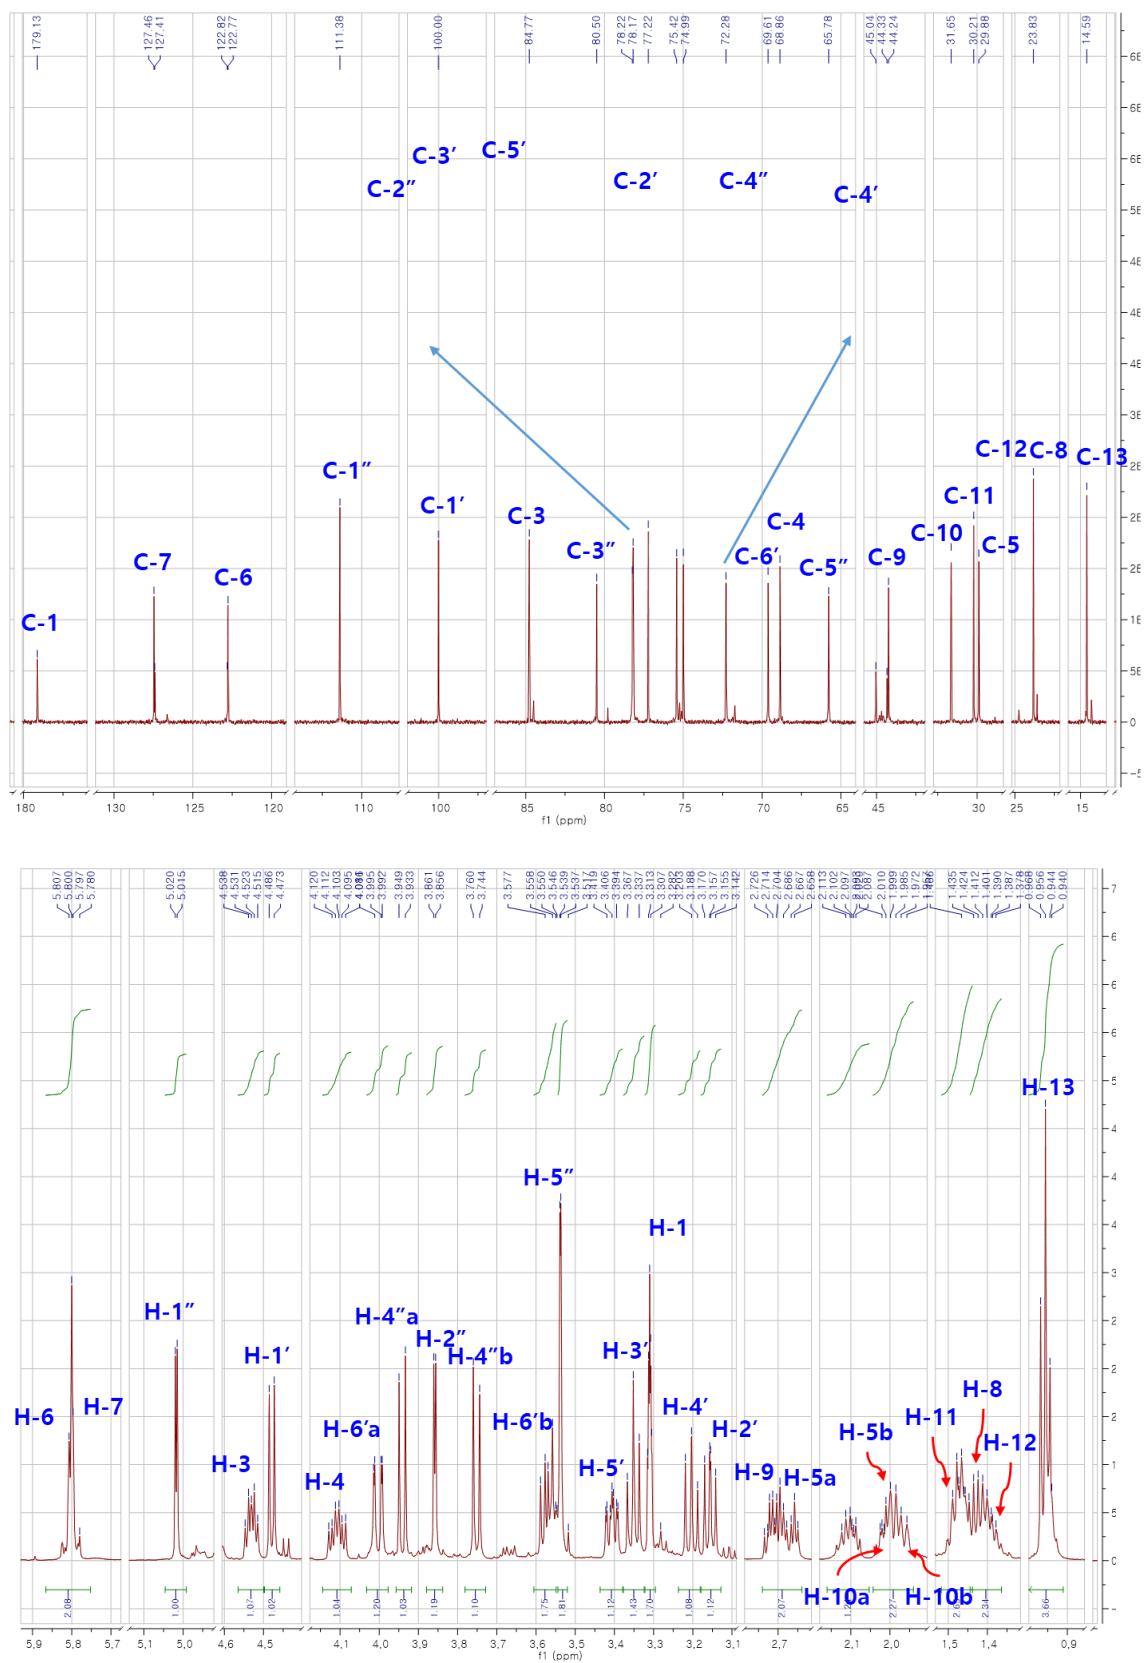

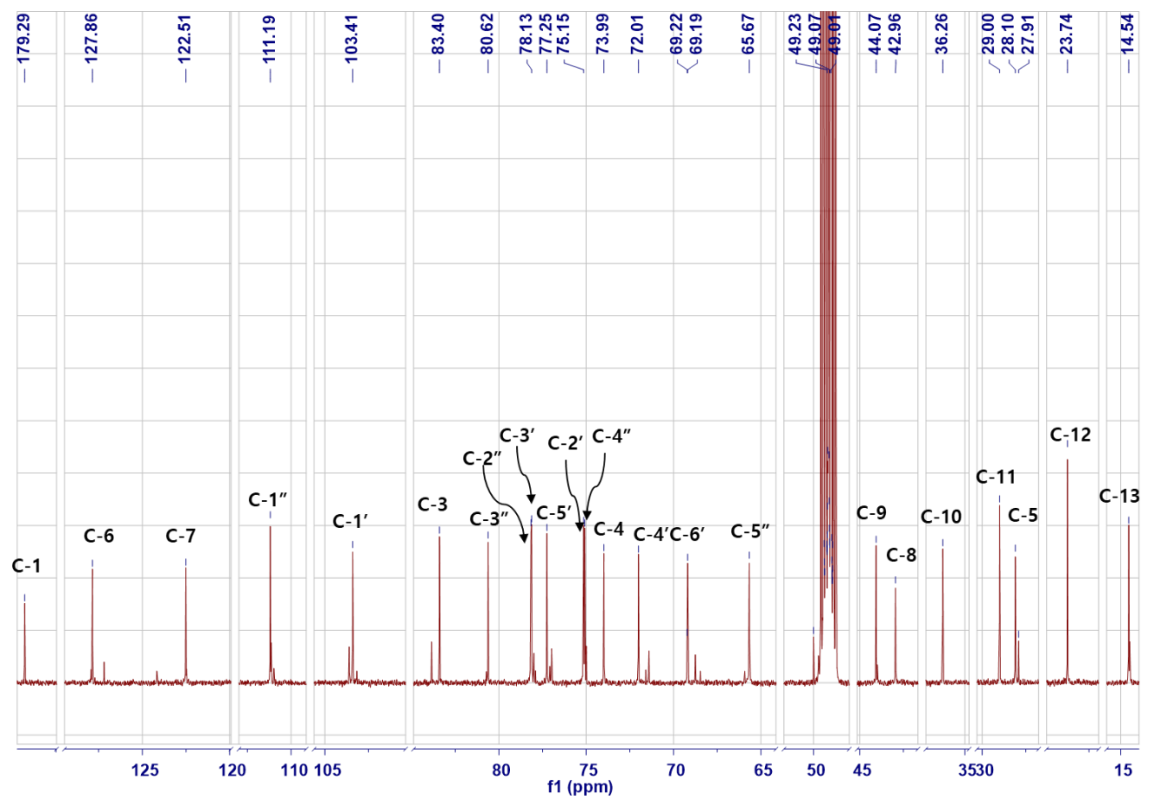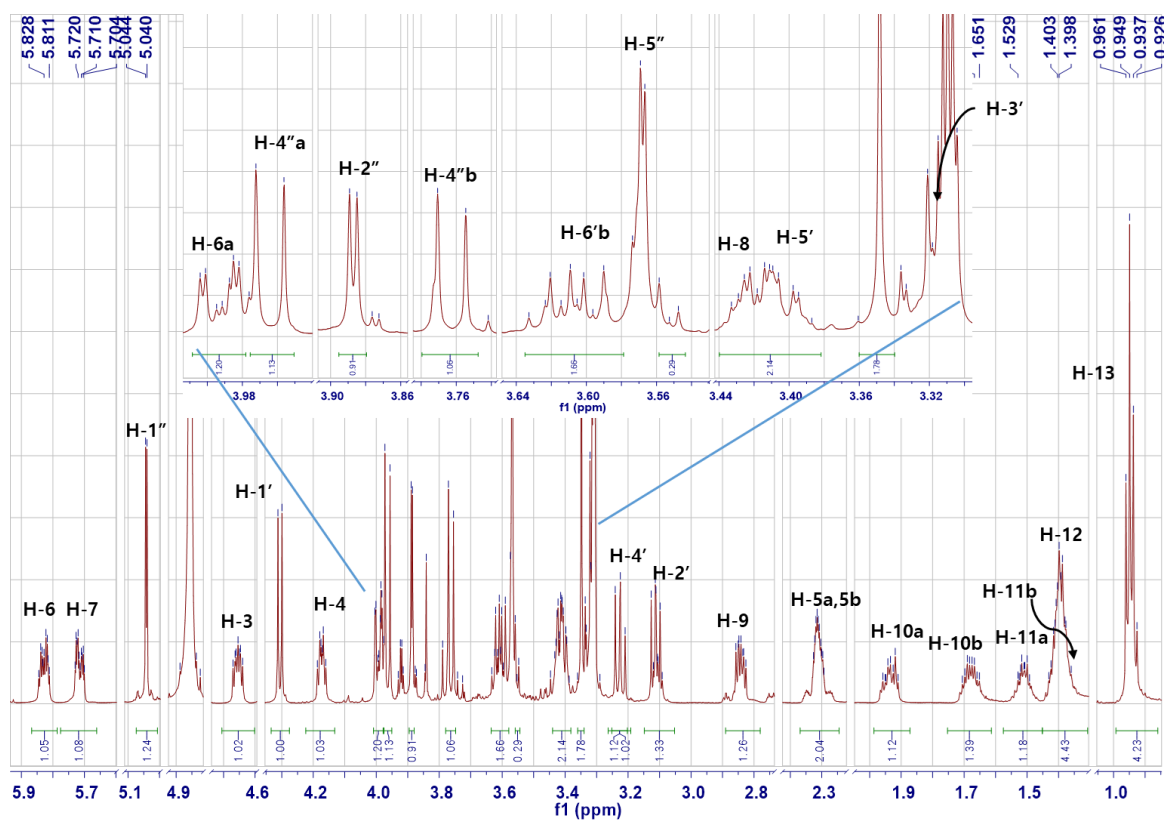

Figure S3.  $^{13}\text{C}$  and  $^1\text{H}$  NMR spectra of ligusticoside E (600 MHz,  $\text{CD}_3\text{OD}$ ).

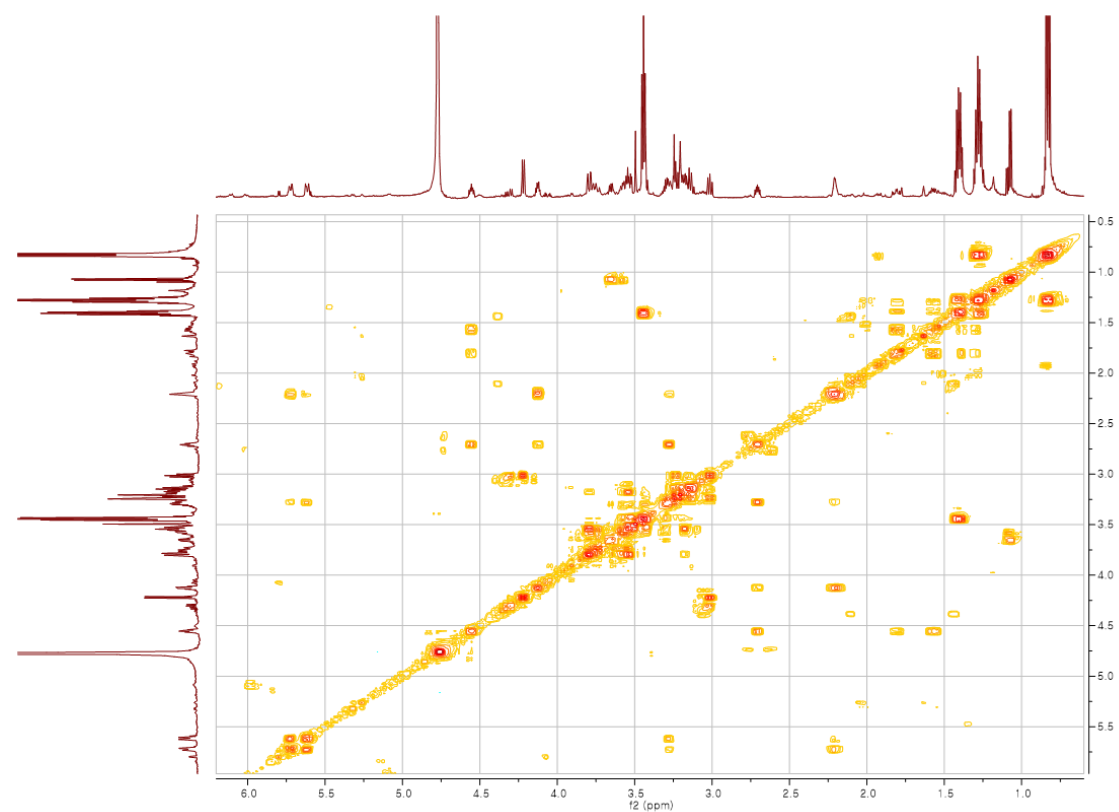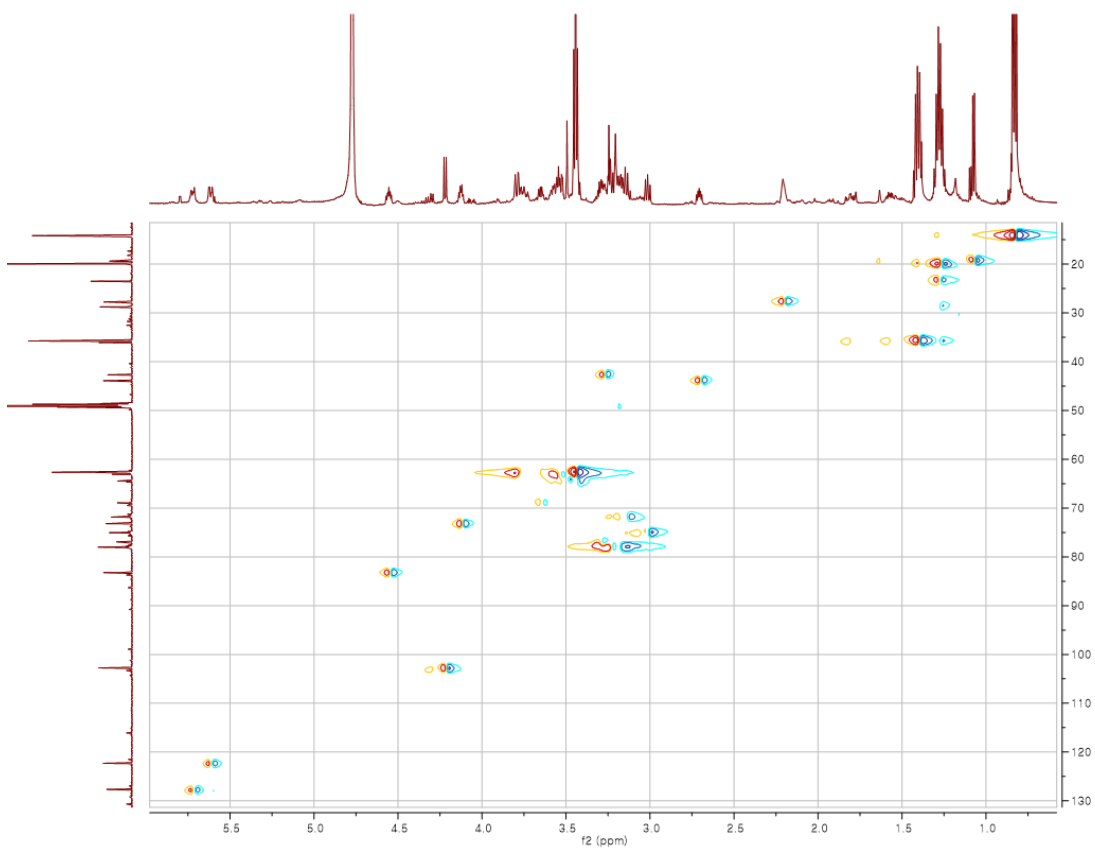

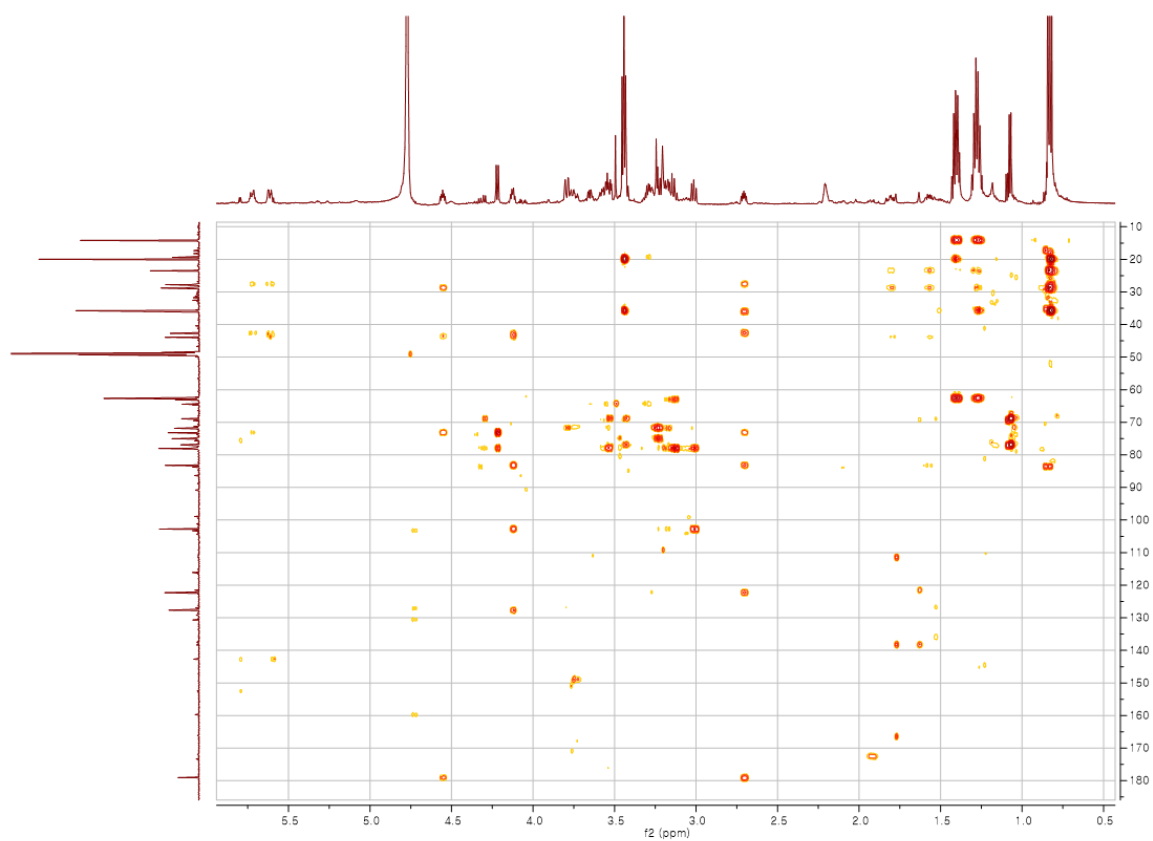

Figure S4.  $^1\text{H}$ - $^1\text{H}$  COSY, HSQC, and HMBC spectra of ligusticoside C (600 MHz,  $\text{CD}_3\text{OD}$ ).

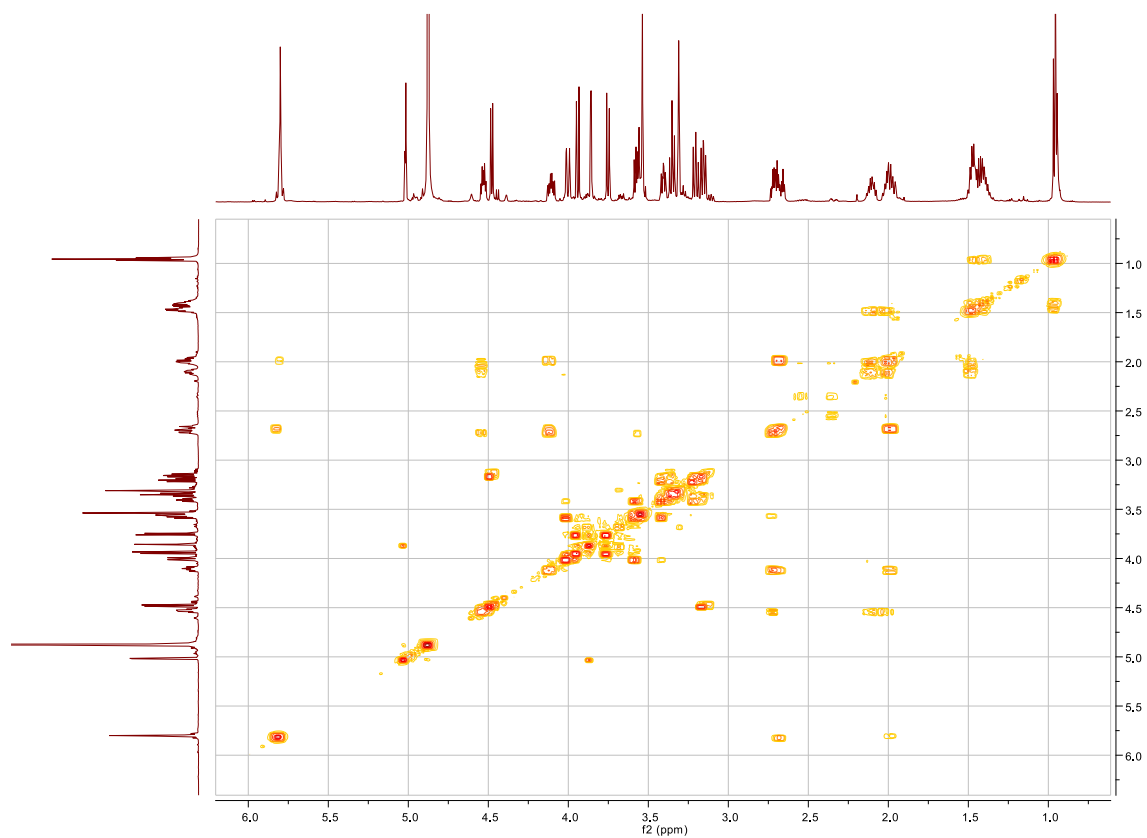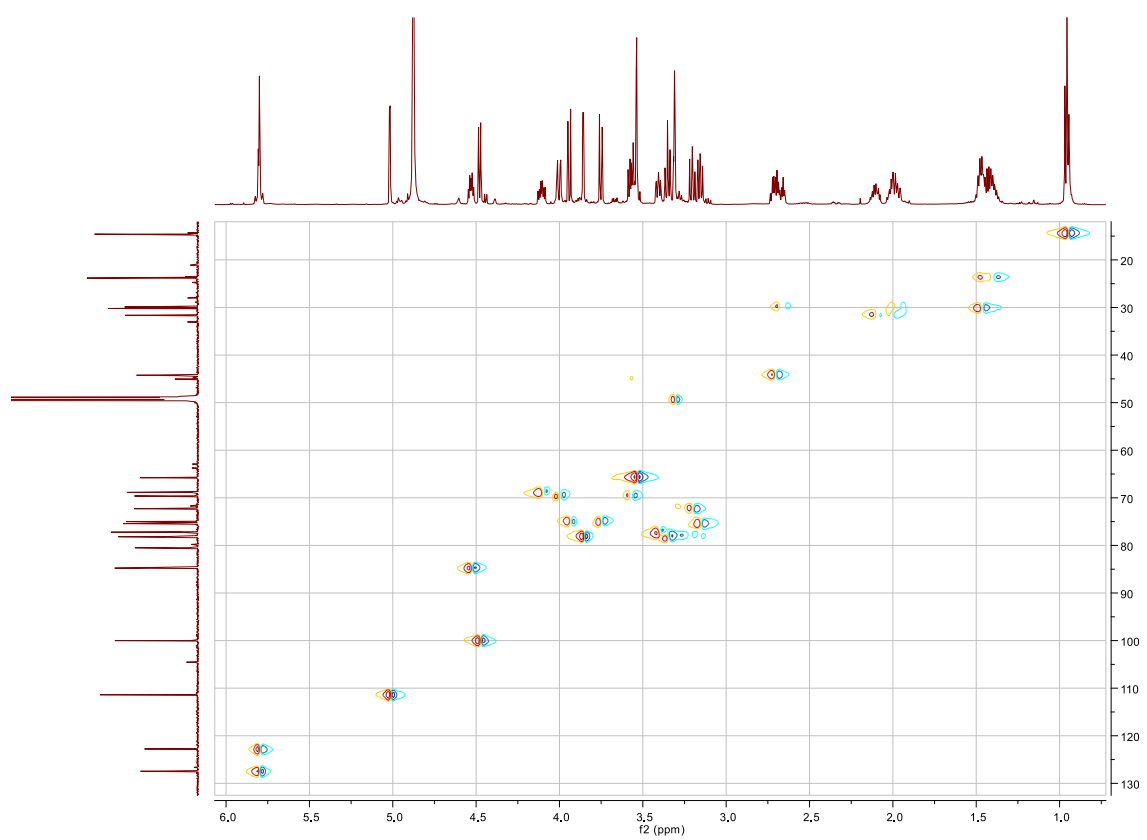

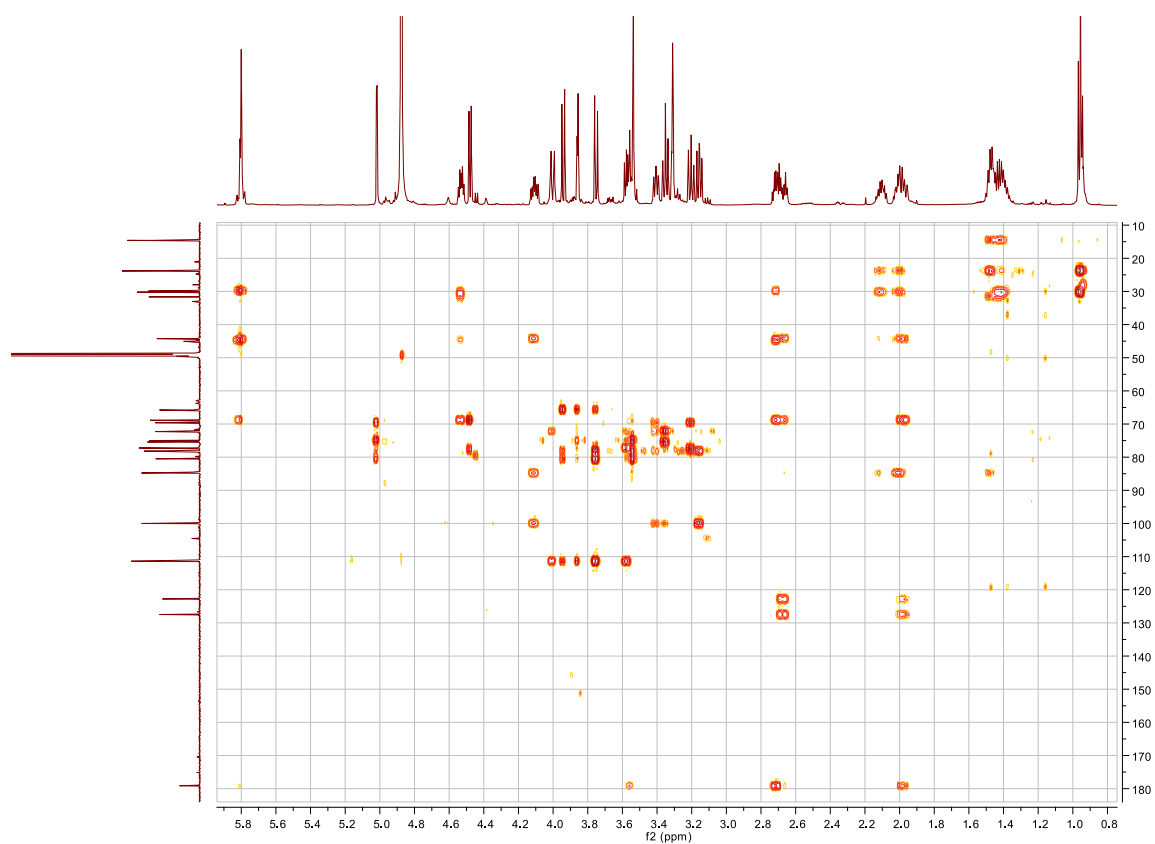

Figure S5.  $^1\text{H}$ - $^1\text{H}$  COSY, HSQC, and HMBC spectra of ligusticoside D (600 MHz,  $\text{CD}_3\text{OD}$ ).



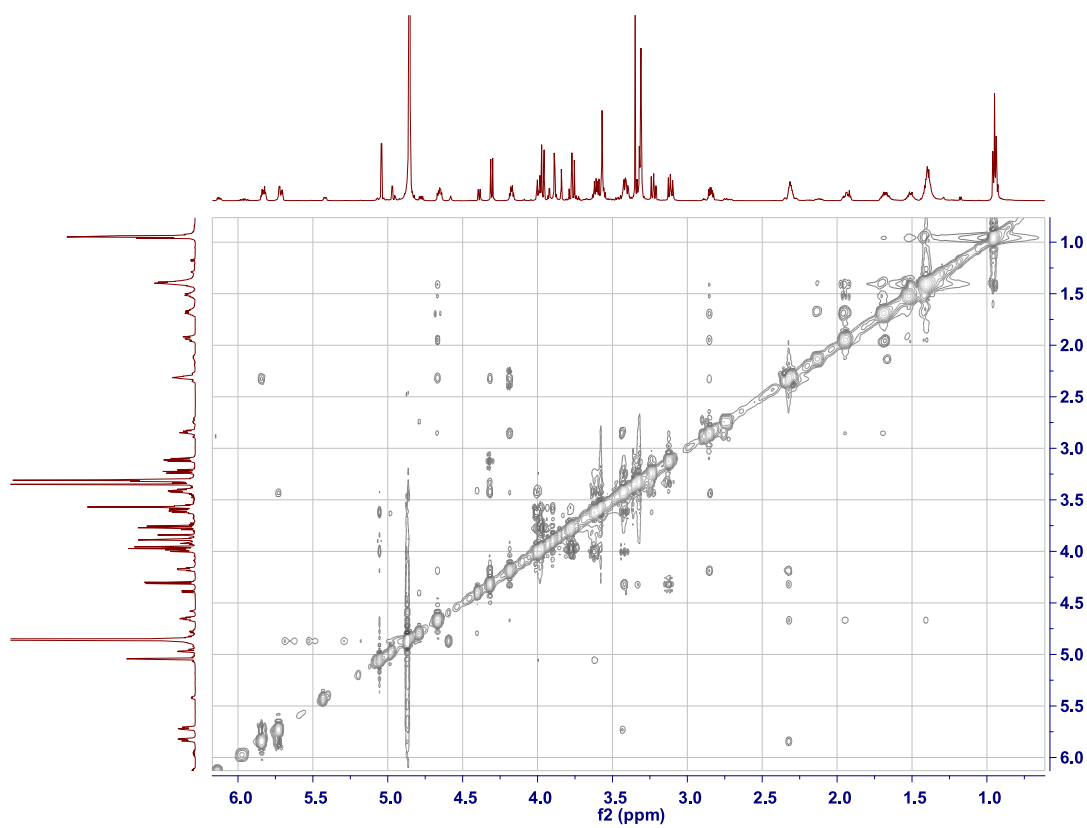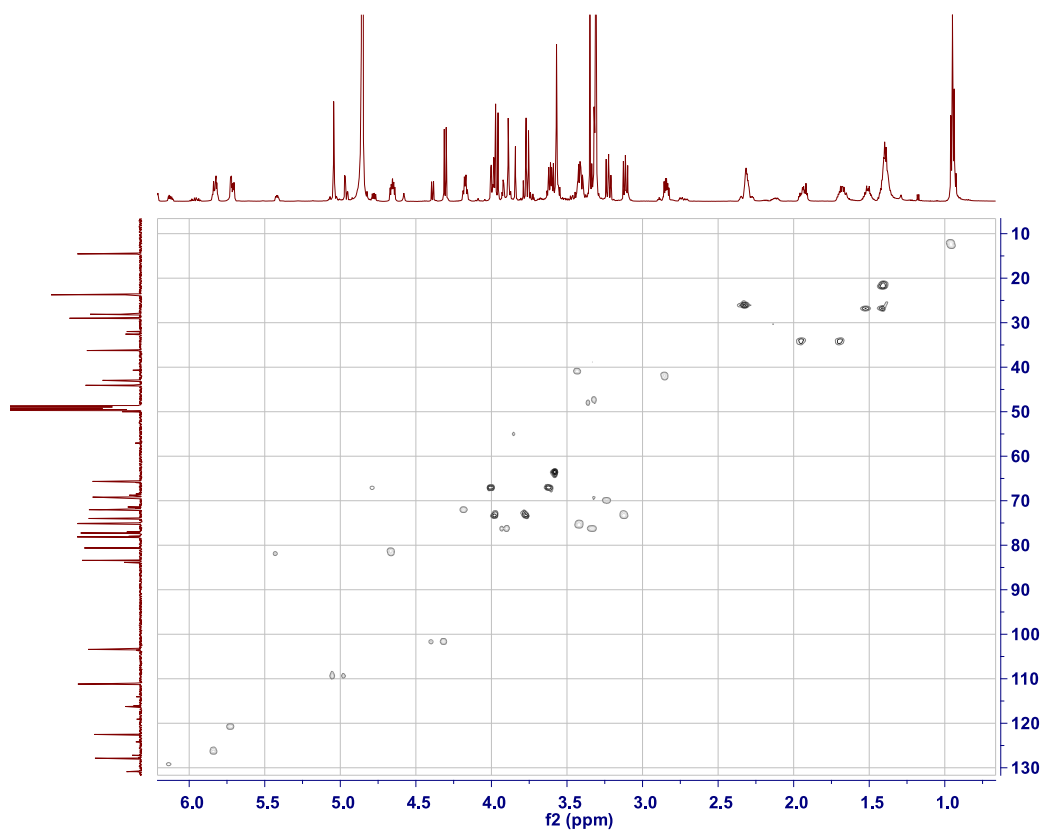

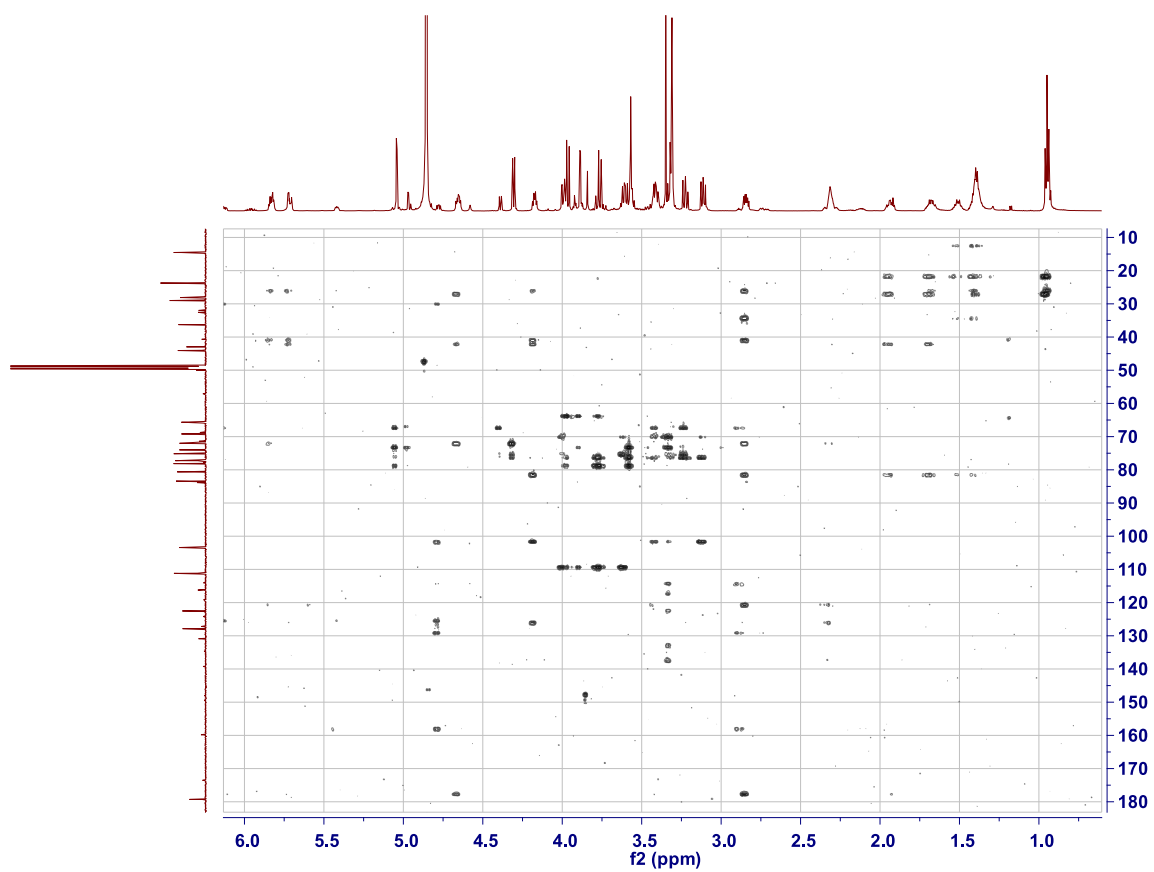

Figure S6.  $^1\text{H}$ - $^1\text{H}$  COSY, HSQC, and HMBC spectra of ligusticoside D (600 MHz,  $\text{CD}_3\text{OD}$ ).
